# Supplementary material for: Slow magnetic relaxation and selective luminescence sensor of Ln-radical chain involving imidazole-substituted nitronyl nitroxide radical
Source: Royal Society of Chemistry journal article supplement (doi:10.1039/d2nj04865e), 2022-01-01
Supplement: d2nj04865e1.pdf [file d2nj04865e1.pdf]

## Slow magnetic relaxation and selective luminescent sensor of Ln-radical chain involving imidazole-substituted nitronyl nitroxide radical

Qing Zhong,<sup>a</sup> Huiyang Dong,<sup>a</sup> Yi Liu<sup>a</sup> and Mei Zhu<sup>\*a</sup>

<sup>a</sup>Department of Chemistry, Key Laboratory of Surface & Interface Science of Polymer Materials of Zhejiang Province, Zhejiang Sci-Tech University, Hangzhou, 310018, China

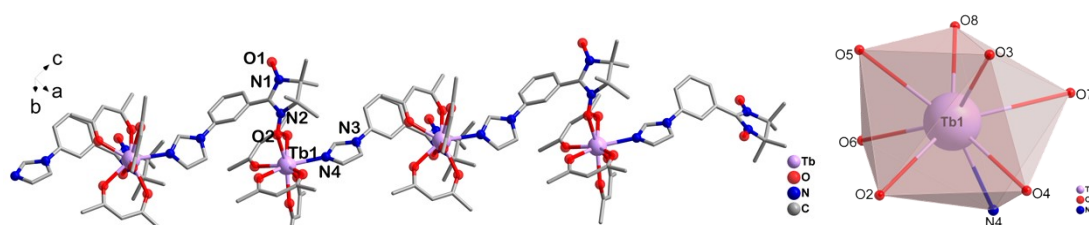

**Fig. S1** (left) Crystal structure of complex 2 (All hydrogen and fluorine atoms are omitted for clarity) and coordination polyhedron of Tb (right).

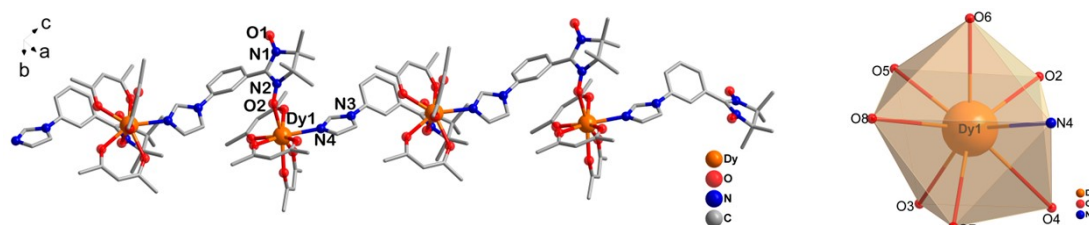

**Fig. S2** (left) Crystal structure of complex 3 (All hydrogen and fluorine atoms are omitted for clarity) and coordination polyhedron of Dy (right).

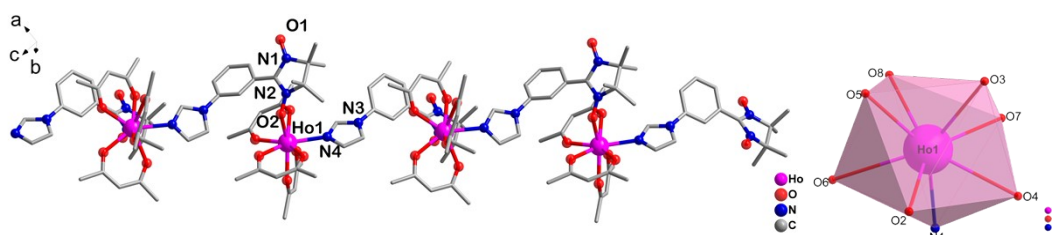

**Fig. S3** (left) Crystal structure of complex 4 (All hydrogen and fluorine atoms are omitted for clarity) and coordination polyhedron of Ho(right).

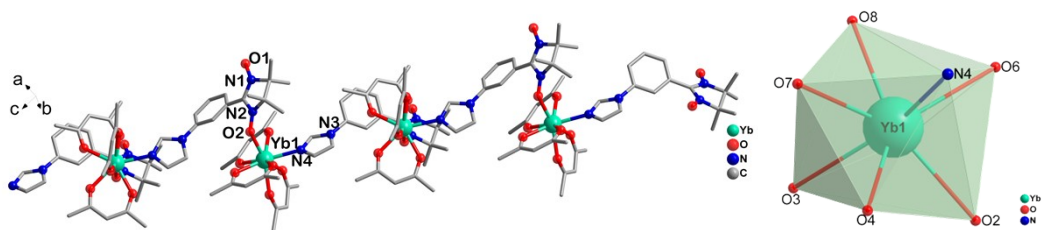

**Fig. S4** (left) Crystal structure of complex **5** (All hydrogen and fluorine atoms are omitted for clarity) and coordination polyhedron of Yb (right).

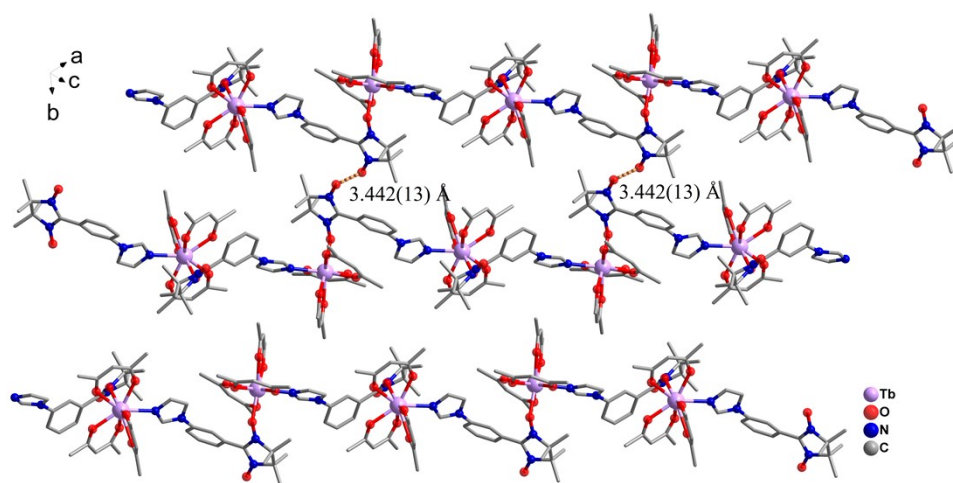

**Fig. S5** Crystal packing diagram of complex **2** (All F and some H atoms are omitted for clarity).

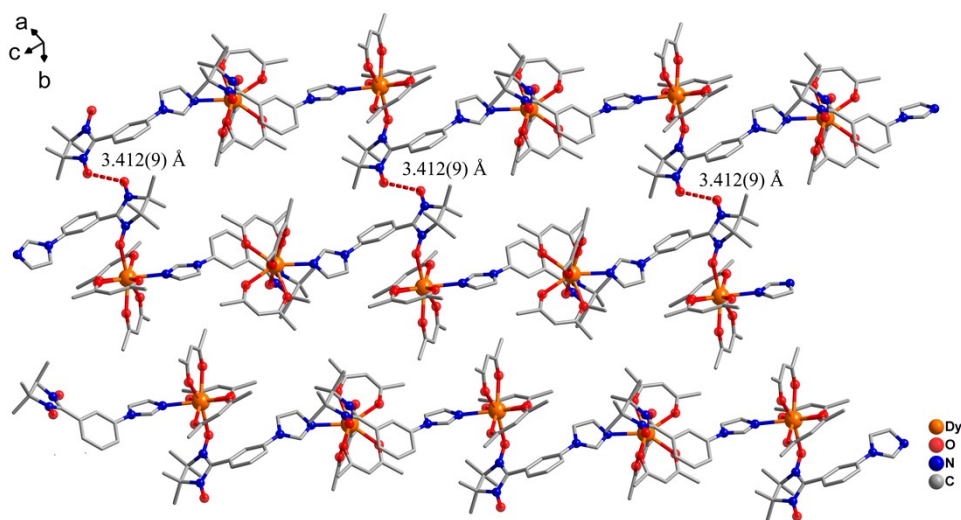

**Fig. S6** Crystal packing diagram of complex **3** (All F and some H atoms are omitted for clarity).

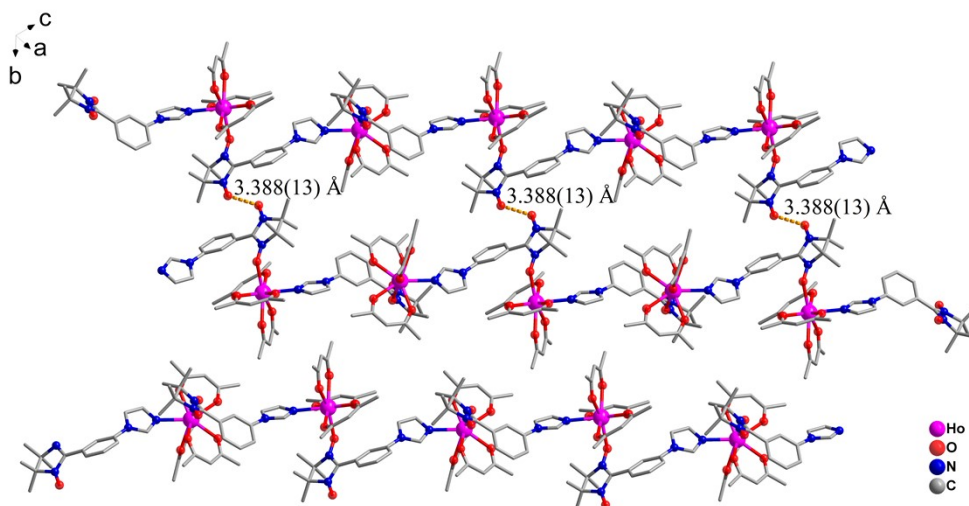

**Fig. S7** Crystal packing diagram of complex **4** (All F and some H atoms are omitted for clarity).

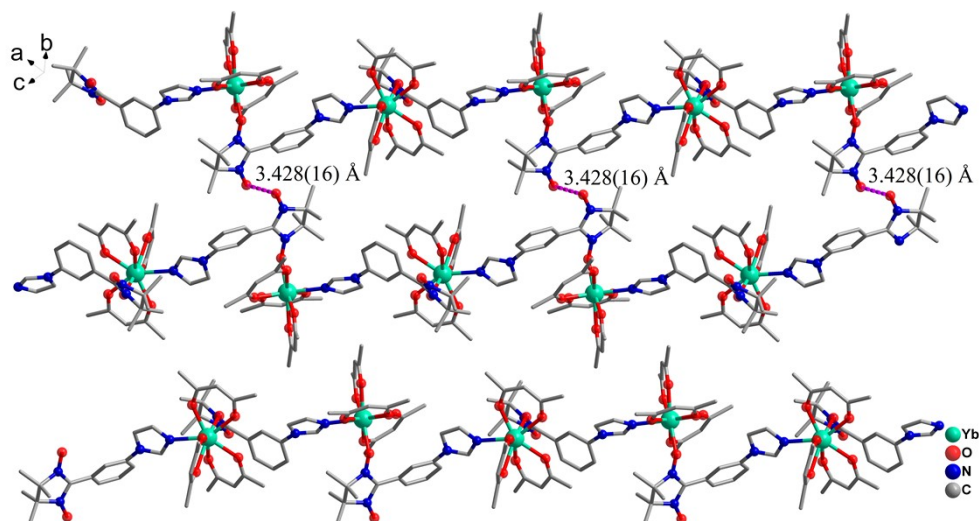

**Fig. S8** Crystal packing diagram of complex **5** (All F and some H atoms are omitted for clarity).

**Table S1.** Selected bond lengths (Å) and angles (°) for complex **1**.

| <i>Bonds</i> |          |            |          |
|--------------|----------|------------|----------|
| Gd(1)–O(2)   | 2.388(6) | Gd(1)–O(3) | 2.403(5) |
| Gd(1)–O(4)   | 2.365(6) | Gd(1)–O(5) | 2.351(5) |
| Gd(1)–O(6)   | 2.379(5) | Gd(1)–O(7) | 2.369(5) |
| Gd(1)–O(8)   | 2.425(5) | Gd(1)–N(4) | 2.496(6) |
| N(1)–O(1)    | 1.274(8) | N(2)–O(2)  | 1.323(8) |

| <i>Angles</i>   |            |                 |            |
|-----------------|------------|-----------------|------------|
| O(2)-Gd(1)-O(3) | 76.10(17)  | O(2)-Gd(1)-O(4) | 78.85(19)  |
| O(2)-Gd(1)-O(5) | 96.24(19)  | O(2)-Gd(1)-O(6) | 74.18(16)  |
| O(2)-Gd(1)-O(7) | 145.27(17) | O(2)-Gd(1)-O(8) | 144.78(16) |
| O(2)-Gd(1)-N(4) | 96.85(18)  | O(3)-Gd(1)-O(4) | 72.59(18)  |
| O(3)-Gd(1)-O(5) | 72.38(17)  | O(3)-Gd(1)-O(6) | 130.49(17) |
| O(3)-Gd(1)-O(7) | 74.20(19)  | O(3)-Gd(1)-O(8) | 129.89(18) |
| O(3)-Gd(1)-N(4) | 146.04(19) | O(4)-Gd(1)-O(5) | 144.77(18) |
| O(4)-Gd(1)-O(6) | 136.45(19) | O(4)-Gd(1)-O(7) | 75.4(2)    |
| O(4)-Gd(1)-O(8) | 127.47(19) | O(4)-Gd(1)-N(4) | 73.5(2)    |
| O(5)-Gd(1)-O(6) | 72.57(18)  | O(5)-Gd(1)-O(7) | 91.6(2)    |
| O(5)-Gd(1)-O(8) | 74.90(18)  | O(5)-Gd(1)-N(4) | 141.53(19) |
| O(6)-Gd(1)-O(7) | 70.64(16)  | O(6)-Gd(1)-O(8) | 70.64(16)  |
| O(6)-Gd(1)-N(4) | 76.54(19)  | O(7)-Gd(1)-O(8) | 69.86(18)  |
| O(7)-Gd(1)-N(4) | 97.8(2)    | O(8)-Gd(1)-N(4) | 73.61(18)  |
| Gd(1)-O(2)-N(2) | 134.8(4)   |                 |            |

**Table S2.** Selected bond lengths (Å) and angles (°) for complex **2**.

| <i>Bonds</i>    |           |                 |           |
|-----------------|-----------|-----------------|-----------|
| Tb(1)–O(2)      | 2.377(4)  | Tb(1)–O(3)      | 2.337(4)  |
| Tb(1)–O(4)      | 2.359(4)  | Tb(1)–O(5)      | 2.377(4)  |
| Tb(1)–O(6)      | 2.350(4)  | Tb(1)–O(7)      | 2.412(4)  |
| Tb(1)–O(8)      | 2.343(4)  | Tb(1)–N(4)      | 2.495(5)  |
| N(1)–O(1)       | 1.263(6)  | N(2)–O(2)       | 1.320(6)  |
| <i>Angles</i>   |           |                 |           |
| O(2)-Tb(1)-O(3) | 96.27(15) | O(2)-Tb(1)-O(4) | 74.41(13) |

|                 |            |                 |            |
|-----------------|------------|-----------------|------------|
| O(2)-Tb(1)-O(5) | 75.73(14)  | O(2)-Tb(1)-O(6) | 78.50(15)  |
| O(2)-Tb(1)-O(7) | 144.81(14) | O(2)-Tb(1)-O(8) | 144.71(14) |
| O(2)-Tb(1)-N(4) | 96.74(14)  | O(3)-Tb(1)-O(4) | 72.62(15)  |
| O(3)-Tb(1)-O(5) | 72.35(14)  | O(3)-Tb(1)-O(6) | 144.77(15) |
| O(3)-Tb(1)-O(7) | 75.02(15)  | O(3)-Tb(1)-O(8) | 91.71(16)  |
| O(3)-Tb(1)-N(4) | 141.73(15) | O(4)-Tb(1)-O(5) | 130.39(14) |
| O(4)-Tb(1)-O(6) | 136.28(15) | O(4)-Tb(1)-O(7) | 70.45(13)  |
| O(4)-Tb(1)-O(8) | 140.38(14) | O(4)-Tb(1)-N(4) | 76.56(15)  |
| O(5)-Tb(1)-O(6) | 72.61(14)  | O(5)-Tb(1)-O(7) | 130.25(14) |
| O(5)-Tb(1)-O(8) | 74.11(15)  | O(5)-Tb(1)-N(4) | 145.88(14) |
| O(6)-Tb(1)-O(7) | 127.65(15) | O(6)-Tb(1)-O(8) | 75.34(16)  |
| O(6)-Tb(1)-N(4) | 73.28(16)  | O(7)-Tb(1)-O(8) | 70.40(15)  |
| O(7)-Tb(1)-N(4) | 73.67(15)  | O(8)-Tb(1)-N(4) | 97.96(16)  |
| Tb(1)-O(2)-N(2) | 133.7(3)   |                 |            |

**Table S3.** Selected bond lengths (Å) and angles (°) for complex **3**.

| <i>Bonds</i>    |           |                 |           |
|-----------------|-----------|-----------------|-----------|
| Dy(1)–O(2)      | 2.364(4)  | Dy(1)–O(3)      | 2.332(4)  |
| Dy(1)–O(4)      | 2.353(4)  | Dy(1)–O(5)      | 2.368(4)  |
| Dy(1)–O(6)      | 2.336(4)  | Dy(1)–O(7)      | 2.376(4)  |
| Dy(1)–O(8)      | 2.331(4)  | Dy(1)–N(4)      | 2.494(4)  |
| N(1)–O(1)       | 1.261(6)  | N(2)–O(2)       | 1.306(6)  |
| <i>Angles</i>   |           |                 |           |
| O(2)-Dy(1)-O(3) | 96.34(14) | O(2)-Dy(1)-O(4) | 73.78(13) |
| O(2)-Dy(1)-O(5) | 75.89(14) | O(2)-Dy(1)-O(6) | 78.88(14) |

|                 |            |                 |            |
|-----------------|------------|-----------------|------------|
| O(2)-Dy(1)-O(7) | 144.53(14) | O(2)-Dy(1)-O(8) | 144.69(14) |
| O(2)-Dy(1)-N(4) | 96.55(14)  | O(3)-Dy(1)-O(4) | 73.25(14)  |
| O(3)-Dy(1)-O(5) | 71.64(14)  | O(3)-Dy(1)-O(6) | 144.51(14) |
| O(3)-Dy(1)-O(7) | 74.86(14)  | O(3)-Dy(1)-O(8) | 91.09(15)  |
| O(3)-Dy(1)-N(4) | 141.98(14) | O(4)-Dy(1)-O(5) | 129.95(13) |
| O(4)-Dy(1)-O(6) | 135.98(14) | O(4)-Dy(1)-O(7) | 70.78(13)  |
| O(4)-Dy(1)-O(8) | 140.97(14) | O(4)-Dy(1)-N(4) | 76.34(14)  |
| O(5)-Dy(1)-O(6) | 73.11(14)  | O(5)-Dy(1)-O(7) | 129.92(14) |
| O(5)-Dy(1)-O(8) | 73.86(14)  | O(5)-Dy(1)-N(4) | 146.34(15) |
| O(6)-Dy(1)-O(7) | 127.67(15) | O(6)-Dy(1)-O(8) | 75.27(15)  |
| O(6)-Dy(1)-N(4) | 73.25(15)  | O(7)-Dy(1)-O(8) | 70.66(14)  |
| O(7)-Dy(1)-N(4) | 73.94(14)  | O(8)-Dy(1)-N(4) | 98.55(15)  |
| Dy(1)-O(2)-N(2) | 134.3(3)   |                 |            |

**Table S4.** Selected bond lengths (Å) and angles (°) for complex **4**.

| <i>Bonds</i>    |            |                 |            |
|-----------------|------------|-----------------|------------|
| Ho(1)–O(2)      | 2.360(4)   | Ho(1)–O(3)      | 2.318(4)   |
| Ho(1)–O(4)      | 2.354(4)   | Ho(1)–O(5)      | 2.362(4)   |
| Ho(1)–O(6)      | 2.322(4)   | Ho(1)–O(7)      | 2.372(4)   |
| Ho(1)–O(8)      | 2.328(4)   | Ho(1)–N(4)      | 2.480(5)   |
| N(1)–O(1)       | 1.252(6)   | N(2)–O(2)       | 1.303(6)   |
| <i>Angles</i>   |            |                 |            |
| O(2)-Ho(1)-O(3) | 96.43(15)  | O(2)-Ho(1)-O(4) | 73.81(14)  |
| O(2)-Ho(1)-O(5) | 75.65(14)  | O(2)-Ho(1)-O(6) | 78.78(15)  |
| O(2)-Ho(1)-O(7) | 144.45(14) | O(2)-Ho(1)-O(8) | 144.48(14) |

|                 |            |                 |            |
|-----------------|------------|-----------------|------------|
| O(2)-Ho(1)-N(4) | 96.74(15)  | O(3)-Ho(1)-O(4) | 73.34(14)  |
| O(3)-Ho(1)-O(5) | 71.47(14)  | O(3)-Ho(1)-O(6) | 144.54(14) |
| O(3)-Ho(1)-O(7) | 74.85(15)  | O(3)-Ho(1)-O(8) | 90.86(16)  |
| O(3)-Ho(1)-N(4) | 142.21(15) | O(4)-Ho(1)-O(5) | 129.67(14) |
| O(4)-Ho(1)-O(6) | 135.87(15) | O(4)-Ho(1)-O(7) | 70.67(14)  |
| O(4)-Ho(1)-O(8) | 141.10(15) | O(4)-Ho(1)-N(4) | 76.65(15)  |
| O(5)-Ho(1)-O(6) | 73.33(15)  | O(5)-Ho(1)-O(7) | 130.13(15) |
| O(5)-Ho(1)-O(8) | 73.89(15)  | O(5)-Ho(1)-N(4) | 146.27(16) |
| O(6)-Ho(1)-O(7) | 127.74(16) | O(6)-Ho(1)-O(8) | 75.36(16)  |
| O(6)-Ho(1)-N(4) | 72.96(15)  | O(7)-Ho(1)-O(8) | 70.94(15)  |
| O(7)-Ho(1)-N(4) | 73.90(15)  | O(8)-Ho(1)-N(4) | 98.48(16)  |
| Ho(1)-O(2)-N(2) | 133.7(3)   |                 |            |

**Table S5.** Selected bond lengths (Å) and angles (°) for complex **5**.

| <i>Bonds</i>    |            |                 |            |
|-----------------|------------|-----------------|------------|
| Yb(1)–O(2)      | 2.317(3)   | Yb(1)–O(3)      | 2.284(3)   |
| Yb(1)–O(4)      | 2.303(3)   | Yb(1)–O(5)      | 2.332(3)   |
| Yb(1)–O(6)      | 2.289(3)   | Yb(1)–O(7)      | 2.352(3)   |
| Yb(1)–O(8)      | 2.290(3)   | Yb(1)–N(4)      | 2.440(3)   |
| N(1)–O(1)       | 1.264(5)   | N(2)–O(2)       | 1.309(5)   |
| <i>Angles</i>   |            |                 |            |
| O(2)-Yb(1)-O(3) | 97.14(11)  | O(2)-Yb(1)-O(4) | 74.17(10)  |
| O(2)-Yb(1)-O(5) | 75.23(11)  | O(2)-Yb(1)-O(6) | 77.41(11)  |
| O(2)-Yb(1)-O(7) | 144.89(11) | O(2)-Yb(1)-O(8) | 143.55(11) |
| O(2)-Yb(1)-N(4) | 97.45(11)  | O(3)-Yb(1)-O(4) | 74.34(11)  |

|                 |            |                 |            |
|-----------------|------------|-----------------|------------|
| O(3)-Yb(1)-O(5) | 70.78(11)  | O(3)-Yb(1)-O(6) | 144.43(11) |
| O(3)-Yb(1)-O(7) | 74.71(11)  | O(3)-Yb(1)-O(8) | 91.49(12)  |
| O(3)-Yb(1)-N(4) | 142.50(11) | O(4)-Yb(1)-O(5) | 129.50(10) |
| O(4)-Yb(1)-O(6) | 134.65(11) | O(4)-Yb(1)-O(7) | 70.74(10)  |
| O(4)-Yb(1)-O(8) | 141.97(11) | O(4)-Yb(1)-N(4) | 76.78(11)  |
| O(5)-Yb(1)-O(6) | 73.88(11)  | O(5)-Yb(1)-O(7) | 130.03(11) |
| O(5)-Yb(1)-O(8) | 74.41(11)  | O(5)-Yb(1)-N(4) | 146.59(11) |
| O(6)-Yb(1)-O(7) | 128.45(11) | O(6)-Yb(1)-O(8) | 75.17(12)  |
| O(6)-Yb(1)-N(4) | 72.71(11)  | O(7)-Yb(1)-O(8) | 71.51(11)  |
| O(7)-Yb(1)-N(4) | 73.52(11)  | O(8)-Yb(1)-N(4) | 96.85(12)  |
| Yb(1)-O(2)-N(2) | 134.1(3)   |                 |            |

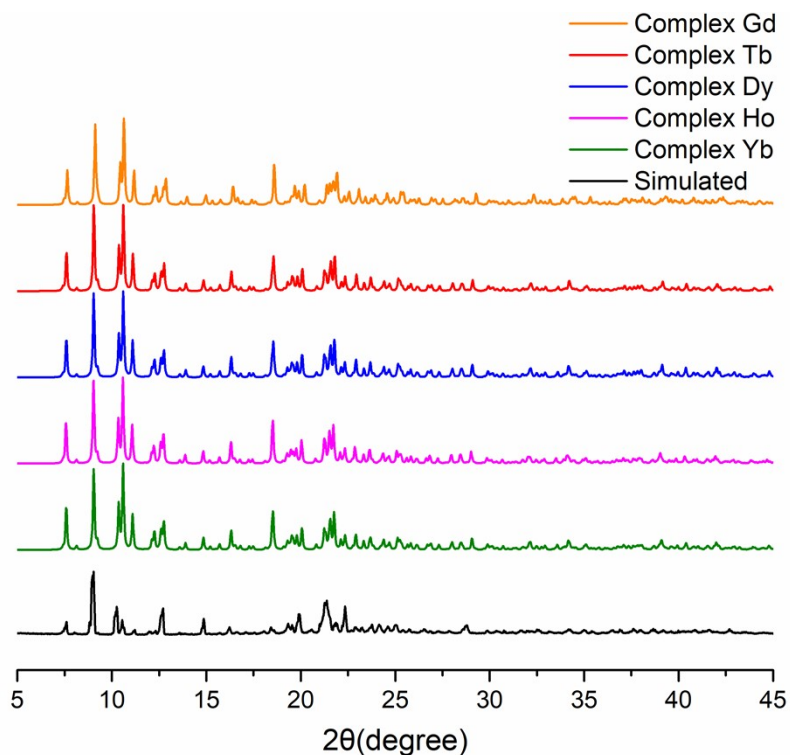

**Fig. S9** Powder X-ray diffraction patterns of complexes **1-5**.



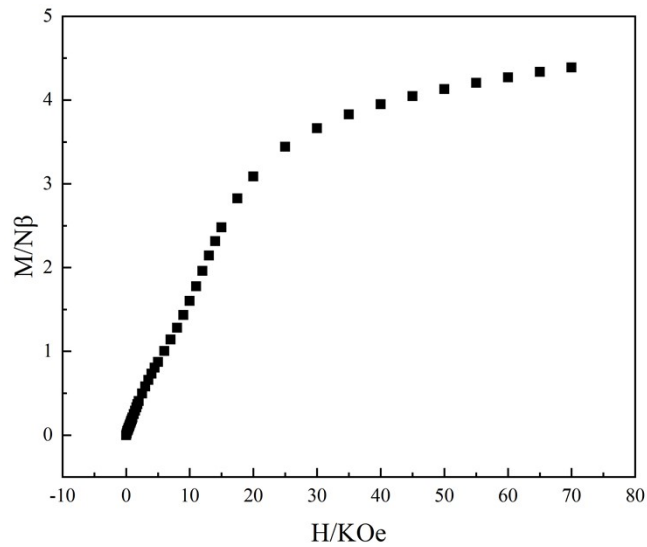

**Fig. S10** The  $M$  vs.  $H$  plots of complex 2 at 2.0 K.

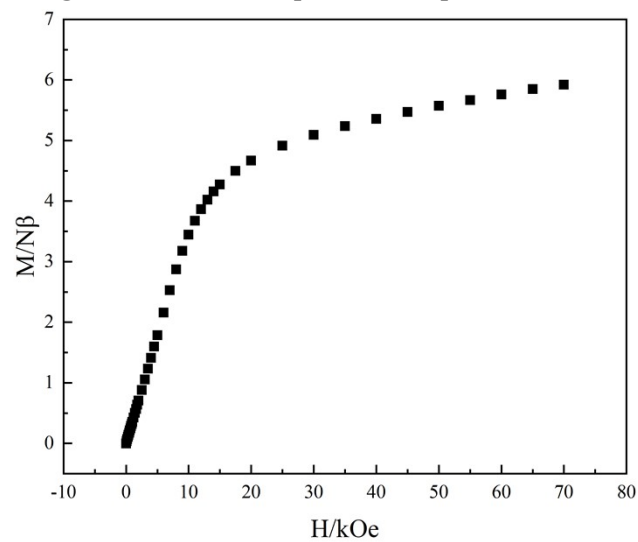

**Fig. S11** The  $M$  vs.  $H$  plots of complex 3 at 2.0 K.

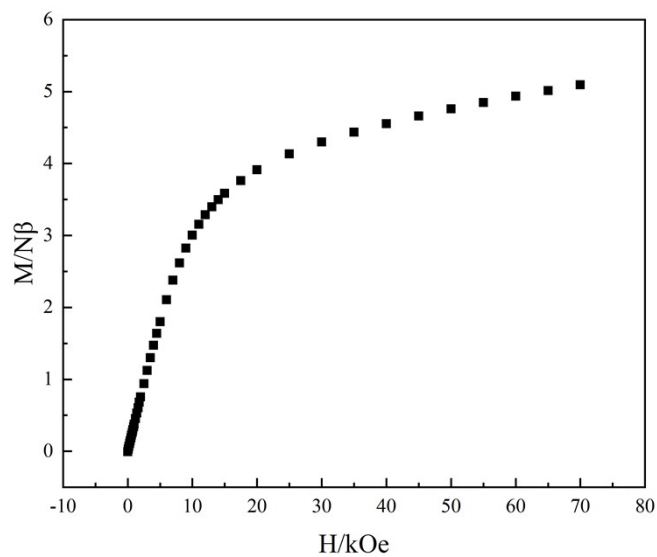

**Fig. S12** The  $M$  vs.  $H$  plots of complex 4 at 2.0 K.

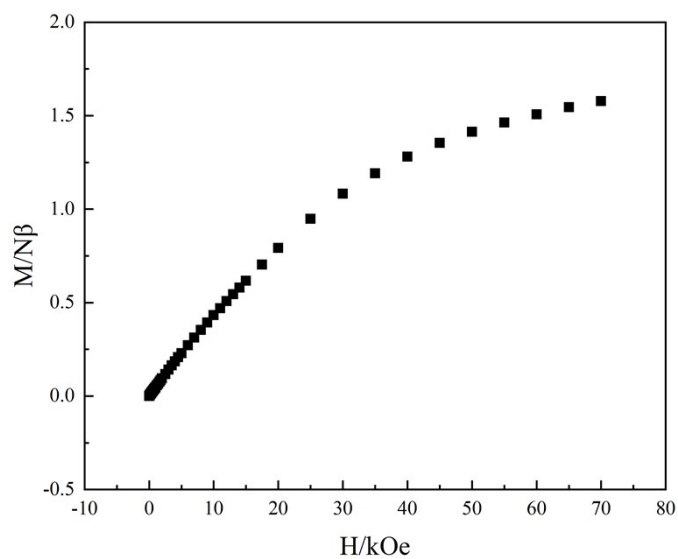

**Fig. S13** The  $M$  vs.  $H$  plots of complex **5** at 2.0 K.

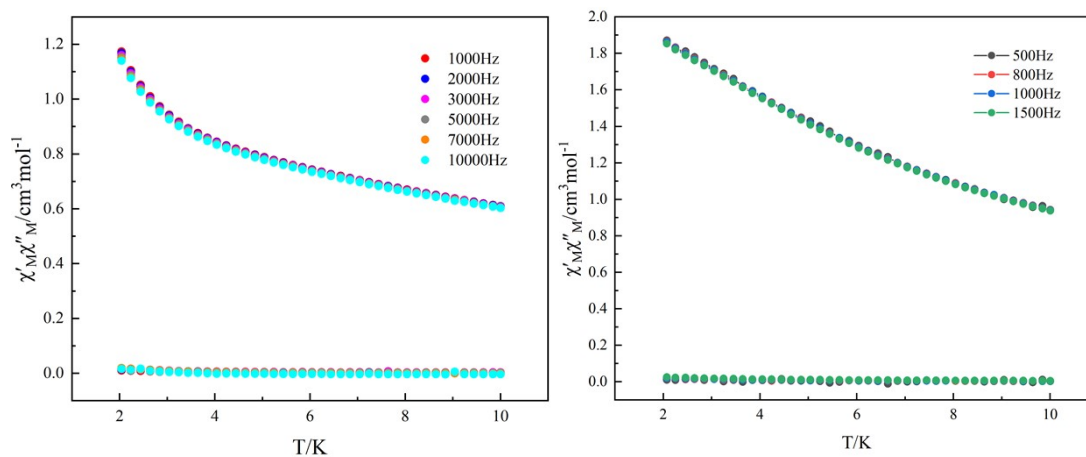

**Fig. S14** Temperature dependence of the in-phase and out-of-phase components of the ac magnetic susceptibility for complex **2** (left) and **3** (right) in zero dc fields.

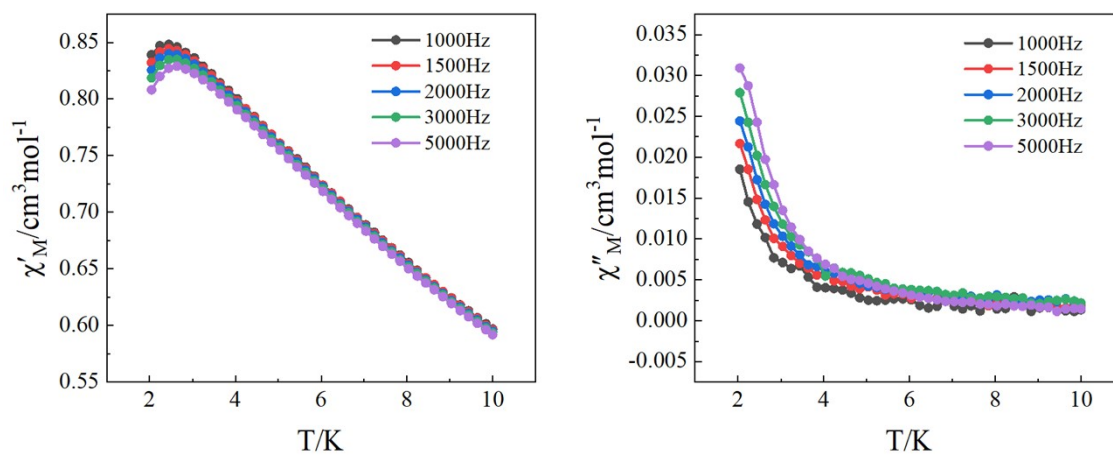

**Fig. S15** Temperature-dependent ac signals for **2** at a 3000 Oe dc field.

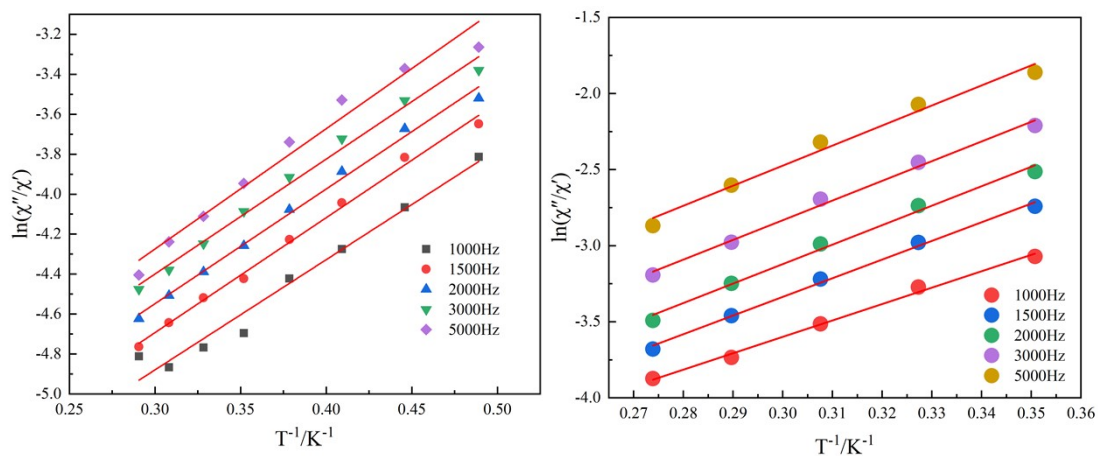

**Fig. S16** Extractive  $\ln(\chi''/\chi')$  vs  $1/T$  plot for **2** (left) and **3** (right) (solid-lines: fitting curves).

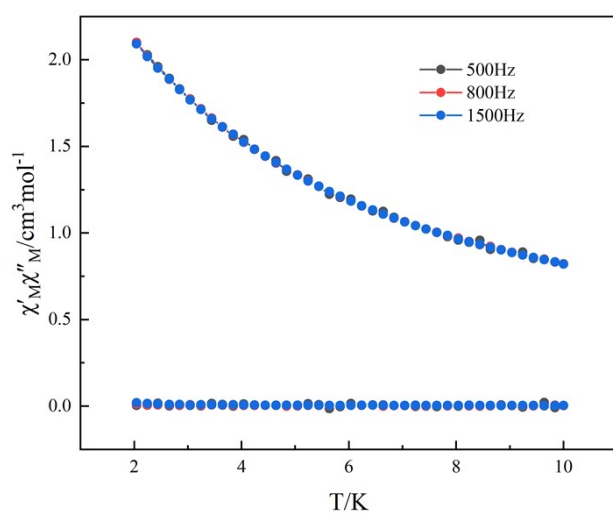

**Fig. S17** Temperature dependence of the in-phase and out-of-phase components of the ac magnetic susceptibility for complex **4**.

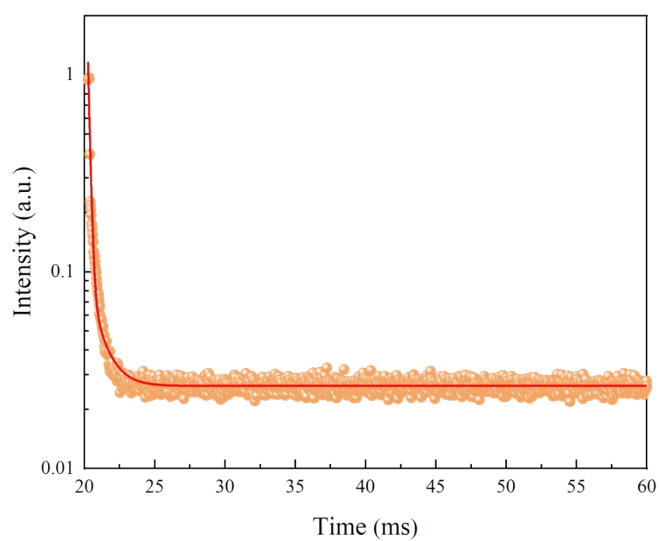

**Fig. S18** The fluorescence decay of complex **2** (solid-lines: fitting curves).

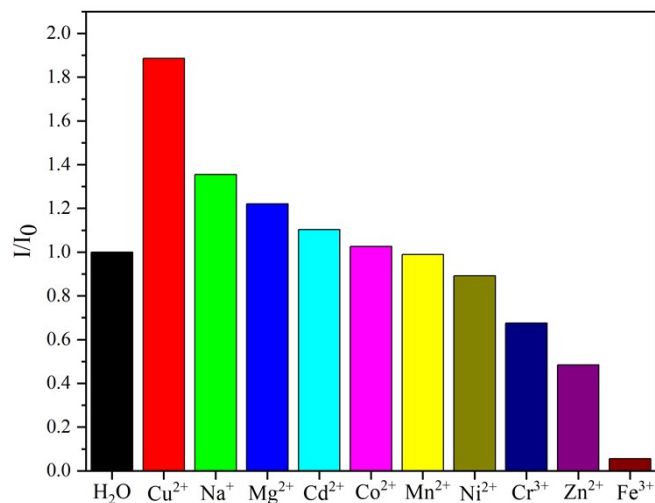

**Fig. S19** Luminescence intensity of the transition (543 nm) of complex **2** in different cations salt solution (1 mM).  $I$  and  $I_0$  denote the fluorescence intensity of complex **2** in cation solution and water, respectively.

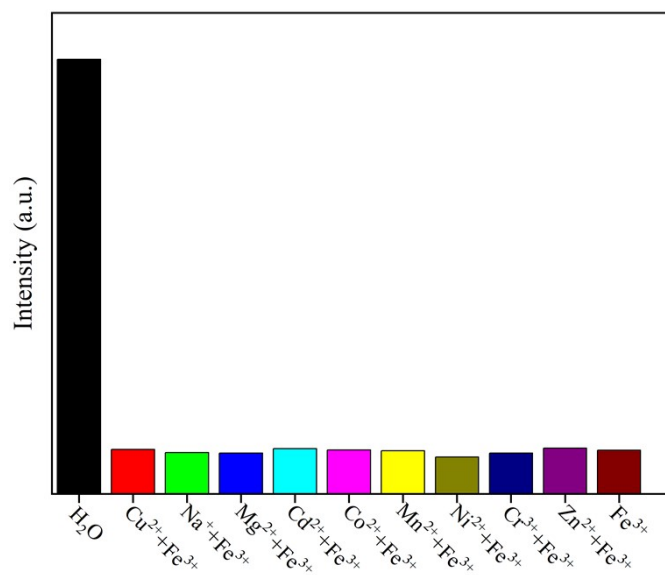

**Fig. S20** Comparison of the luminescence intensity of **2** in the presence of mixed cations.

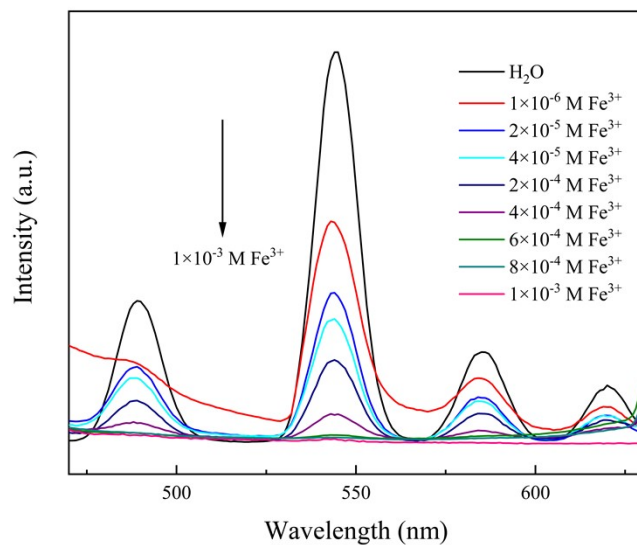

**Fig. S21** Emission spectra of complex **2** with different concentration of  $\text{Fe}^{3+}$  aqueous solution ( $\lambda_{\text{exc}} = 328 \text{ nm}$ ).

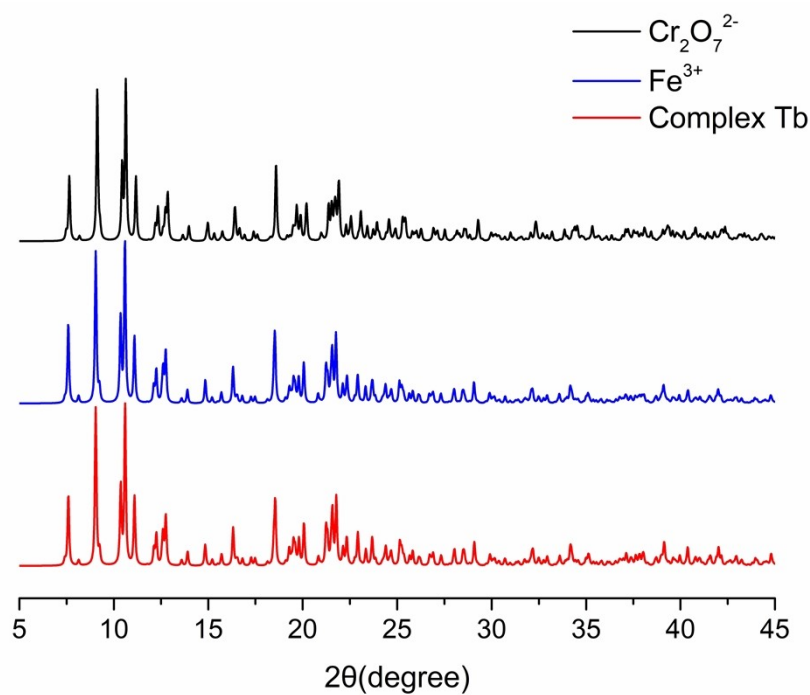

**Fig. S22** PXRD patterns of Tb complex after soaking in  $\text{Cr}_2\text{O}_7^{2-}$  and  $\text{Fe}^{3+}$  ions.

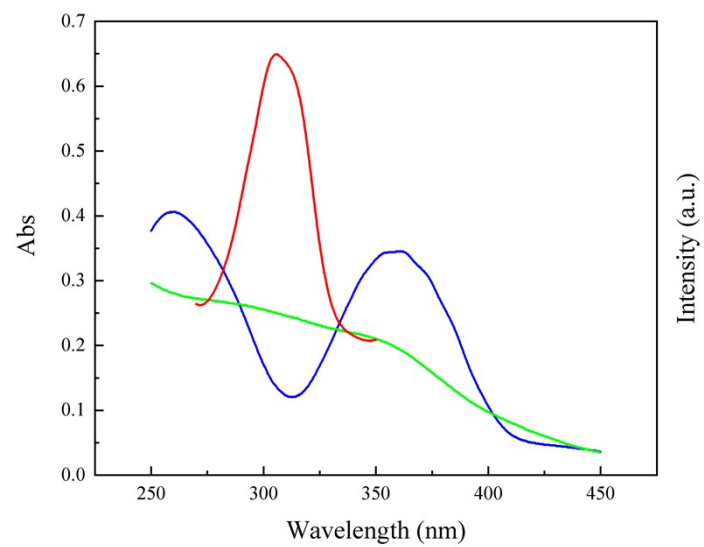

**Fig. S23** The UV-vis absorption spectra of Cr<sub>2</sub>O<sub>7</sub><sup>2-</sup> (blue) and Fe<sup>3+</sup> (green), and the excitation spectra of complex **2** (red).
